# Supplementary material for: Vibrational circular dichroism spectra of proline in water at different pH values
Source: Royal Society of Chemistry journal article supplement (doi:10.1039/d4cp01768d), 2024-01-01
Supplement: d4cp01768d2.pdf [file d4cp01768d2.pdf]

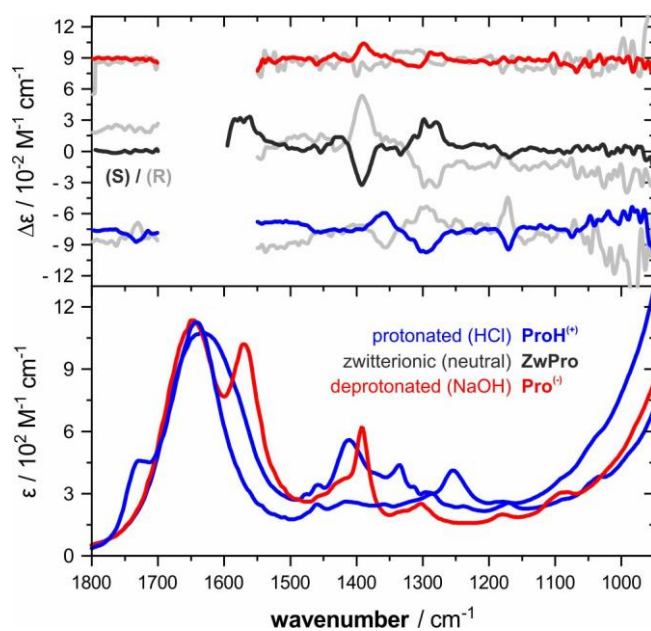

**Figure S1.** Experimental spectra of both enantiomers of proline at different pH values, baseline correction for VCD spectra was performed by subtracting the VCD spectra of the racemic mixture at same conditions.

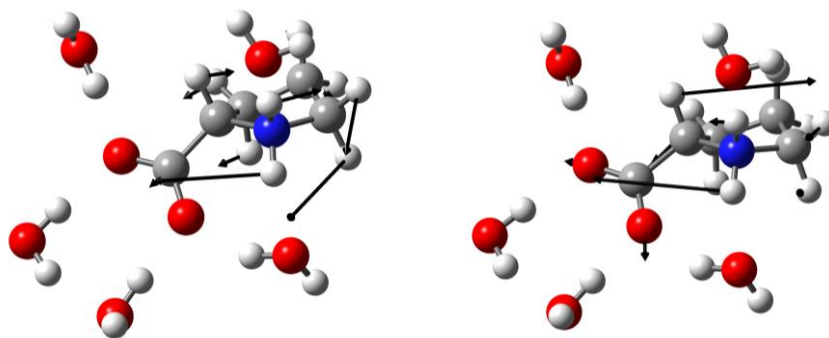

**Figure S2.** Displacement vectors exemplifying the vibrational modes that change the most among the solvated clusters **ZwPro**-(H<sub>2</sub>O)<sub>5</sub>. Left: Mode at ~1375 cm<sup>-1</sup>; right: mode at ~1430 cm<sup>-1</sup>.

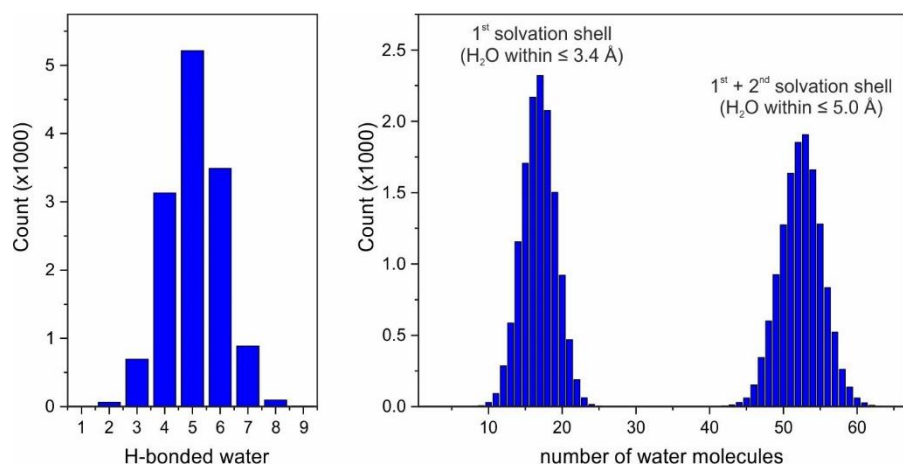

**Figure S3.** Statistical analysis of solute-solvent hydrogen bonds and number of solvent molecules in the first and second solvation sphere of **ZwPro**.

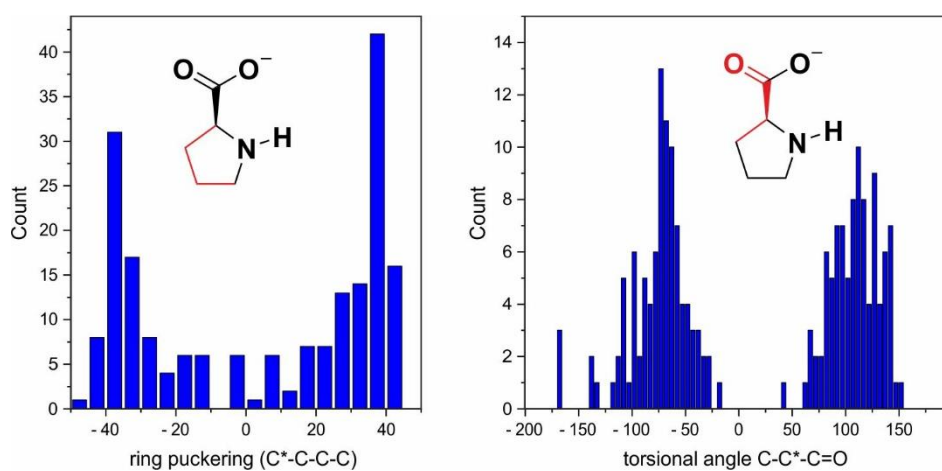

**Figure S4.** Conformation of **ZwPro** in DFT-optimized **ZwPro**-(H<sub>2</sub>O)<sub>30</sub> clusters.

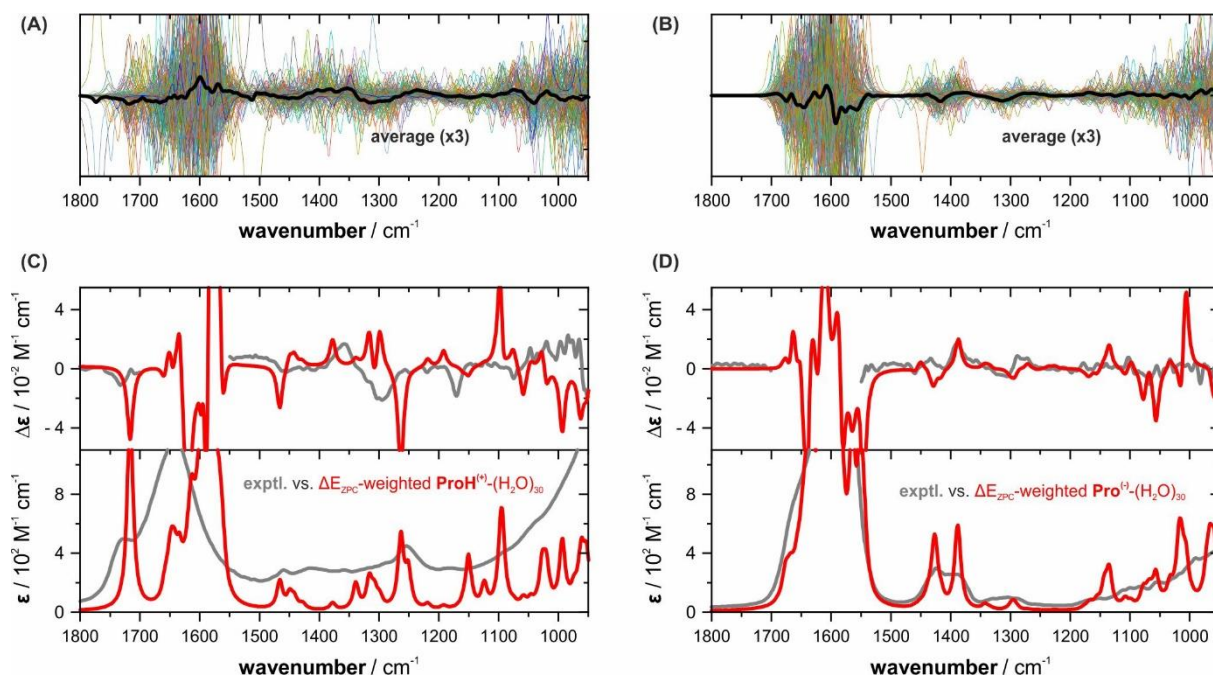

**Figure S5.** Overlay of all computed spectra of (A)  $\text{ProH}^{(+)}\text{-(H}_2\text{O)}_{30}$  and (B)  $\text{Pro}^{(-)}\text{-(H}_2\text{O)}_{30}$  and comparison of the Boltzmann-weighted spectra of (C)  $\text{ProH}^{(+)}\text{-(H}_2\text{O)}_{30}$  and (D)  $\text{Pro}^{(-)}\text{-(H}_2\text{O)}_{30}$  with the experimental spectra.

**Table S1.** Conformer energies of isolated **ZwPro**,  $\text{ProH}^{(+)}$  and  $\text{Pro}^{(-)}$ , total energies ( $E$ ,  $E_{\text{zpc}}$ ,  $G$ ) in Hartree, energies with respect to lowest conformer energy ( $\Delta E$ ,  $\Delta E_{\text{zpc}}$ ,  $\Delta G$ ) in kcal/mol.

| Conformer       | $E$          | $E_{\text{zpc}}$ | $G$          | $\Delta E$ | $\Delta E_{\text{zpc}}$ | $\Delta G$ |
|-----------------|--------------|------------------|--------------|------------|-------------------------|------------|
| <b>ZwPro_c1</b> | -401.2207854 | -401.0746245     | -401.0675176 | 0.000      | 0.000                   | 0.000      |
| <b>ZwPro_c2</b> | -401.2202572 | -401.0740545     | -401.0668673 | 0.331      | 0.358                   | 0.408      |

| Conformer       | $E$          | $E_{\text{zpc}}$ | $G$          | $\Delta E$ | $\Delta E_{\text{zpc}}$ | $\Delta G$ |
|-----------------|--------------|------------------|--------------|------------|-------------------------|------------|
| <b>ProH+_c1</b> | -401.6645956 | -401.5051234     | -401.4975282 | 0.000      | 0.000                   | 0.000      |
| <b>ProH+_c2</b> | -401.6642843 | -401.5045057     | -401.4970419 | 0.195      | 0.388                   | 0.305      |
| <b>ProH+_c3</b> | -401.6606887 | -401.5010353     | -401.4934212 | 2.452      | 2.565                   | 2.577      |
| <b>ProH+_c4</b> | -401.6599087 | -401.5002016     | -401.4926728 | 2.941      | 3.088                   | 3.047      |

| Conformer      | $E$          | $E_{\text{zpc}}$ | $G$          | $\Delta E$ | $\Delta E_{\text{zpc}}$ | $\Delta G$ |
|----------------|--------------|------------------|--------------|------------|-------------------------|------------|
| <b>Pro-_c1</b> | -400.7469547 | -400.6155980     | -400.6084086 | 0.000      | 0.000                   | 0.000      |
| <b>Pro-_c2</b> | -400.7465385 | -400.6154400     | -400.6081267 | 0.261      | 0.099                   | 0.177      |
| <b>Pro-_c3</b> | -400.7425714 | -400.6117159     | -400.6043151 | 2.751      | 2.436                   | 2.569      |
| <b>Pro-_c4</b> | -400.7417821 | -400.6106026     | -400.6032891 | 3.246      | 3.135                   | 3.213      |

Energies and structures of all solvated structures are given in a separate SI file.
